# Supplementary material for: Development and acceptability testing of a decision aid for considering whether to reduce antipsychotics in individuals with stable schizophrenia
Source: PubMed Central journal article supplement (PMC10496039; doi:10.1002/npr2.12366), 2023-07-14
Supplement: NPR2-43-391-s004.pdf [file NPR2-43-391-s004.pdf]

## Appendix 1. Content and rationale of the DA

| Content                                                                                                                                                                                           | Pages | Rationale/Reference                                                                                                                                                                                                                                                                                                                                                              |
|---------------------------------------------------------------------------------------------------------------------------------------------------------------------------------------------------|-------|----------------------------------------------------------------------------------------------------------------------------------------------------------------------------------------------------------------------------------------------------------------------------------------------------------------------------------------------------------------------------------|
| <b>About this booklet</b>                                                                                                                                                                         |       |                                                                                                                                                                                                                                                                                                                                                                                  |
| Description of the decision to be considered<br>Explanation of the target population<br>Instructions on the use of the booklet                                                                    | 1–3   | <i>IPDASi Qualifying Criteria: The patient decision aid explicitly states the decision that needs to be considered (index decision).</i>                                                                                                                                                                                                                                         |
| <b>What is schizophrenia?</b>                                                                                                                                                                     |       |                                                                                                                                                                                                                                                                                                                                                                                  |
| Objective information about schizophrenia, such as symptoms, recovery as a goal, treatment, and course<br>Explanation for non-recommendations on this DA, including discontinuation of medication | 3–7   | <i>IPDASi Qualifying Criteria: The patient decision aid describes the health condition or problem for which the index decision is required.</i><br>- Leamy et al. Br J Psychiatry. 199: 445–452, 2011.<br>- Gardener et al. Am J Psychiatry. 167: 686–693, 2010.                                                                                                                 |
| <b>A: Monotherapy</b>                                                                                                                                                                             |       |                                                                                                                                                                                                                                                                                                                                                                                  |
| <b>Step 1: Further treatment options</b>                                                                                                                                                          |       |                                                                                                                                                                                                                                                                                                                                                                                  |
| Options provided:<br>Option 1: To continue the current high-dose antipsychotics<br>Option 2: To reduce to the standard dose                                                                       | 9–13  | <i>IPDASi Qualifying Criteria: The patient decision aid describes the options available for the index decision.</i>                                                                                                                                                                                                                                                              |
| <b>Step 2: Comparing the pros and cons of each option</b>                                                                                                                                         |       |                                                                                                                                                                                                                                                                                                                                                                                  |
| A table comparing the options (advantages and disadvantages)                                                                                                                                      | 14    | <i>IPDASi Qualifying Criteria: The patient decision aid describes the positive features of each option.</i><br><i>IPDASi Qualifying Criteria: The patient decision aid describes the negative features of each option.</i><br>- Gardener et al. Am J Psychiatry. 167: 686–693, 2010.<br>- Watanabe. Nervous system agents in Current Drug Therapy, NANKO-DO, 2021 (in Japanese). |
| <b>Step 3: Comparing the consequences of each option</b>                                                                                                                                          |       |                                                                                                                                                                                                                                                                                                                                                                                  |
| Pictorial diagrams of the recurrence rates for each option                                                                                                                                        | 15    | <i>IPDASi Qualifying Criteria: The patient decision aid describes what it is like to experience the consequences of the options.</i><br>-Tani, et al. Neuropsychopharmacology. 45:887–901, 2020.                                                                                                                                                                                 |
| <b>Step 4: Value clarification</b>                                                                                                                                                                |       |                                                                                                                                                                                                                                                                                                                                                                                  |
| A value-clarification exercise with a 5-point Likert scale                                                                                                                                        | 16    | <i>IPDASi Qualifying Criteria: The patient decision aid asks patients to identify which positive and negative features of the options are important to them.</i>                                                                                                                                                                                                                 |
| <b>Step 5: Preparation for shared decision making</b>                                                                                                                                             |       |                                                                                                                                                                                                                                                                                                                                                                                  |
| Memo field to prepare for decision-making consultation                                                                                                                                            | 17    | <i>IPDASi Qualifying Criteria: The patient decision aid includes tools such as worksheets or lists of questions to use when discussing options with a practitioner.</i>                                                                                                                                                                                                          |
| <b>A: Combined use of two antipsychotic drugs</b>                                                                                                                                                 |       |                                                                                                                                                                                                                                                                                                                                                                                  |
| <b>Step 1: Further treatment options</b>                                                                                                                                                          |       |                                                                                                                                                                                                                                                                                                                                                                                  |
| Options provided:<br>Option 1: To continue the current two antipsychotics.<br>Option 2: To shift to monotherapy                                                                                   | 18–21 | <i>IPDASi Qualifying Criteria: The patient decision aid describes the options available for the index decision.</i>                                                                                                                                                                                                                                                              |

## Appendix 1. Continued

### Step 2: Comparing advantages and disadvantages of each option

|                                                          |    |                                                                                                                                                                                                                                                                                                                                                                                                    |
|----------------------------------------------------------|----|----------------------------------------------------------------------------------------------------------------------------------------------------------------------------------------------------------------------------------------------------------------------------------------------------------------------------------------------------------------------------------------------------|
| A table comparing options (advantages and disadvantages) | 22 | <p><i>IPDASi Qualifying Criteria: The patient decision aid describes the positive features of each option.</i></p> <p><i>IPDASi Qualifying Criteria: The patient decision aid describes the negative features of each option.</i></p> <p>- Gardener et al. Am J Psychiatry. 167: 686–693, 2010.</p> <p>- Watanabe. Nervous system agents in Current Drug Therapy, NANKO-DO, 2021 (in Japanese)</p> |
|----------------------------------------------------------|----|----------------------------------------------------------------------------------------------------------------------------------------------------------------------------------------------------------------------------------------------------------------------------------------------------------------------------------------------------------------------------------------------------|

### Step 3: Comparing the consequences of each option

|                                                            |    |                                                                                                                                                                                                    |
|------------------------------------------------------------|----|----------------------------------------------------------------------------------------------------------------------------------------------------------------------------------------------------|
| Pictorial diagrams of the recurrence rates for each option | 23 | <p><i>IPDASi Qualifying Criteria: The patient decision aid describes what it is like to experience the consequences of the options.</i></p> <p>-Matsui, et al. Schizophr Res. 209:50–57, 2019.</p> |
|------------------------------------------------------------|----|----------------------------------------------------------------------------------------------------------------------------------------------------------------------------------------------------|

### Step 4: Value clarification

|                                                            |    |                                                                                                                                                                         |
|------------------------------------------------------------|----|-------------------------------------------------------------------------------------------------------------------------------------------------------------------------|
| A value-clarification exercise with a 5-point Likert scale | 24 | <p><i>IPDASi Qualifying Criteria: The patient decision aid asks patients to identify which positive and negative features of the options are important to them.</i></p> |
|------------------------------------------------------------|----|-------------------------------------------------------------------------------------------------------------------------------------------------------------------------|

### Step 5: Preparation for shared decision making

|                                                        |    |                                                                                                                                                                                |
|--------------------------------------------------------|----|--------------------------------------------------------------------------------------------------------------------------------------------------------------------------------|
| Memo field to prepare for decision-making consultation | 25 | <p><i>IPDASi Qualifying Criteria: The patient decision aid includes tools such as worksheets or lists of questions to use when discussing options with a practitioner.</i></p> |
|--------------------------------------------------------|----|--------------------------------------------------------------------------------------------------------------------------------------------------------------------------------|

### Appendices

|                                                                                                                                                                                                                                                   |       |                                                                                                                                                                                                                                                                                                                                                                                                                                                                                                                                                                                                                                                                                                                                                                                                                             |
|---------------------------------------------------------------------------------------------------------------------------------------------------------------------------------------------------------------------------------------------------|-------|-----------------------------------------------------------------------------------------------------------------------------------------------------------------------------------------------------------------------------------------------------------------------------------------------------------------------------------------------------------------------------------------------------------------------------------------------------------------------------------------------------------------------------------------------------------------------------------------------------------------------------------------------------------------------------------------------------------------------------------------------------------------------------------------------------------------------------|
| <ul style="list-style-type: none"> <li>- Chlorpromazine-based dose</li> <li>- Side effects of antipsychotics</li> <li>- Recovery</li> <li>- Coping strategies to promote recovery</li> <li>- Details of side effects of antipsychotics</li> </ul> | 26-32 | <p>Chlorpromazine-based dose:</p> <p>-Inagaki and Inada. Japanese Journal of Clinical Pharmacology. 18:1457–1480, 2015 (in Japanese).</p> <p>-Inagaki and Inada. Japanese Journal of Clinical Pharmacology. 20:89–97, 2017 (in Japanese).</p> <p>Side effects:</p> <p>-Watanabe. Nervous system agents in Current Drug Therapy, NANKO-DO, 2021 (in Japanese).</p> <p>Recovery/Coping strategies to promote recovery.</p> <p>-Yamaguhi and Kumakura. Journal of Clinical and Experimental Medicine (IGAKU NO AYUMI). 261: 941-948, 2017 (in Japanese).</p> <p>-Leamy et al. Br J Psychiatry. 199-:445–452, 2011.</p> <p>Details of side effects of antipsychotics</p> <p>-Uchida et al. transl. Talor et al. The Maudsley Prescribing Guidelines in Psychiatry 13th Edition, Wiley Publishing Japan, 2019 (in Japanese).</p> |
|---------------------------------------------------------------------------------------------------------------------------------------------------------------------------------------------------------------------------------------------------|-------|-----------------------------------------------------------------------------------------------------------------------------------------------------------------------------------------------------------------------------------------------------------------------------------------------------------------------------------------------------------------------------------------------------------------------------------------------------------------------------------------------------------------------------------------------------------------------------------------------------------------------------------------------------------------------------------------------------------------------------------------------------------------------------------------------------------------------------|
