# Supplementary material for: Development and acceptability testing of a decision aid for considering whether to reduce antipsychotics in individuals with stable schizophrenia
Source: PubMed Central journal article supplement (PMC10496039; doi:10.1002/npr2.12366), 2023-07-14
Supplement: NPR2-43-391-s005.pdf [file NPR2-43-391-s005.pdf]

Appendix 4. International Patient Decision Aid Standards criteria met by current decision aid (Joseph-Williams et al., 2014)

| Item          | 1. Qualifying Criteria                                                                                                                                                                                                                                                                                                                                                           | 2. Certification Criteria                                                                 | 3. Quality Criteria                                                                                                                                                                                                                                                                                                                                                                                                                                                                                                                                                                                      |
|---------------|----------------------------------------------------------------------------------------------------------------------------------------------------------------------------------------------------------------------------------------------------------------------------------------------------------------------------------------------------------------------------------|-------------------------------------------------------------------------------------------|----------------------------------------------------------------------------------------------------------------------------------------------------------------------------------------------------------------------------------------------------------------------------------------------------------------------------------------------------------------------------------------------------------------------------------------------------------------------------------------------------------------------------------------------------------------------------------------------------------|
| Information   | <p>Describes the health condition or problem for which decision is required <sup>a</sup></p> <p>Explicitly states decision that needs to be considered <sup>a</sup></p> <p>Describes the options available for the index decision <sup>a</sup></p> <p>Describes positive features of each option <sup>a</sup></p> <p>Describes negative features of each option <sup>a</sup></p> | <p>Shows the negative and positive features of options with equal detail <sup>a</sup></p> | <p>Describes the natural course of the health condition or problem if no action is taken <sup>a</sup></p> <p>Makes it possible to compare the positive and negative features of available options <sup>a</sup></p>                                                                                                                                                                                                                                                                                                                                                                                       |
| Probabilities |                                                                                                                                                                                                                                                                                                                                                                                  |                                                                                           | <p>Provides information about outcome probabilities associated with the options <sup>a</sup></p> <p>Specifies the defined group of patients for whom the outcome probabilities apply <sup>a</sup></p> <p>Specifies the event rates for outcome probabilities <sup>a</sup></p> <p>Allows the user to compare outcome probabilities across options using the same time period <sup>a</sup></p> <p>Allows the user to compare outcome probabilities across the same denominator <sup>a</sup></p> <p>Provides more than 1 way of viewing the probabilities (e.g., words, numbers, diagrams) <sup>a</sup></p> |
| Values        | <p>Describes what it is like to experience consequence of the options <sup>a</sup></p>                                                                                                                                                                                                                                                                                           |                                                                                           | <p>Asks patients to think about which positive and negative features of options matter most to them <sup>a</sup></p>                                                                                                                                                                                                                                                                                                                                                                                                                                                                                     |
| Guidance      |                                                                                                                                                                                                                                                                                                                                                                                  |                                                                                           | <p>Provides a step-by-step way to make a decision <sup>a</sup></p> <p>Includes tools like worksheets or lists of questions to use when discussing options with a practitioner <sup>a</sup></p>                                                                                                                                                                                                                                                                                                                                                                                                           |
| Development   |                                                                                                                                                                                                                                                                                                                                                                                  |                                                                                           | <p>Development process included a needs assessment with clients or patients <sup>a</sup></p> <p>Development process included a needs assessment with health professionals <sup>a</sup></p>                                                                                                                                                                                                                                                                                                                                                                                                               |

Appendix 4. *Continued*

| Item                                               | 1. Qualifying Criteria | 2. Certification Criteria                                                                                                                                                                                                                                                                                         | 3. Quality Criteria                                                                                                                                                                                                                                                                                                                                                                                                                                                                                                                                                                                             |
|----------------------------------------------------|------------------------|-------------------------------------------------------------------------------------------------------------------------------------------------------------------------------------------------------------------------------------------------------------------------------------------------------------------|-----------------------------------------------------------------------------------------------------------------------------------------------------------------------------------------------------------------------------------------------------------------------------------------------------------------------------------------------------------------------------------------------------------------------------------------------------------------------------------------------------------------------------------------------------------------------------------------------------------------|
| Evidence                                           |                        | <p>Provides citations to the evidence selected <sup>a</sup></p> <p>Provides a production or publication date <sup>a</sup></p> <p>Provides information about the update policy <sup>a</sup></p> <p>Provides information about the levels of uncertainty around the event or outcome probabilities <sup>a</sup></p> | <p>Development process included review by clients/patients not involved in producing the decision support intervention <sup>a</sup></p> <p>Development process included review by professionals not involved in producing the decision support intervention <sup>a</sup></p> <p>Field tested with patients who were facing the decision <sup>b</sup></p> <p>Field tested with practitioners who counsel patients who face the decision <sup>b</sup></p> <p>Describes how research evidence was selected or synthesized <sup>a</sup></p> <p>Describes the quality of the research evidence used <sup>a</sup></p> |
| <p>Disclosure</p> <p>Plain Language Evaluation</p> |                        | <p>Provides information about the funding source used for development <sup>a</sup></p> <p>Describes what the test is designed to measure <sup>b</sup></p>                                                                                                                                                         | <p>Includes authors'/developers' credentials or qualifications <sup>a</sup></p> <p>Reports readability levels <sup>a</sup></p> <p>Evidence improved match between preferences of the informed patient and the option chosen <sup>b</sup></p> <p>Evidence patient decision aid helps patients improve their knowledge about options' features <sup>b</sup></p>                                                                                                                                                                                                                                                   |

a. Criteria met by the developed decision aid

b. Criteria to be met with effectiveness testing, not applicable for the current decision aid
