# Supplementary material for: Development and acceptability testing of a decision aid for considering whether to reduce antipsychotics in individuals with stable schizophrenia
Source: PubMed Central journal article supplement (PMC10496039; doi:10.1002/npr2.12366), 2023-07-14
Supplement: NPR2-43-391-s007.pdf [file NPR2-43-391-s007.pdf]

## Data supporting the results reported in the article

| Patients                                   | 1 | 2 | 3 | 4 | 5 | 6 | 7 | 8 | 9 | 10 | 11 | 12 | 13 | 14 | 15 | 16 | 17 | 18 | 19 | 20 |
|--------------------------------------------|---|---|---|---|---|---|---|---|---|----|----|----|----|----|----|----|----|----|----|----|
| About this booklet                         | 3 | 3 | 3 | 2 | 3 | 2 | 2 | 2 | 3 | 3  | 3  | 3  | 3  | 4  | 2  | 3  | 3  | 2  | 3  | 3  |
| What is schizophrenia?                     | 3 | 3 | 3 |   | 3 | 2 | 2 | 1 | 3 | 3  | 4  | 3  | 3  | 4  | 3  | 4  | 3  | 2  | 2  | 1  |
| Monotherapy:                               |   |   |   |   |   |   |   |   |   |    |    |    |    |    |    |    |    |    |    |    |
| Further treatment options                  | 2 | 3 | 3 | 2 | 2 | 2 | 2 | 4 | 3 | 2  | 3  | 3  | 3  | 4  | 3  | 3  | 3  | 2  | 2  | 1  |
| Comparing the pros and cons of each option | 3 | 3 | 3 | 2 | 2 | 2 | 3 | 3 | 3 | 2  | 2  | 3  | 4  | 3  | 3  | 3  | 2  | 2  | 3  | 1  |
| Comparing the consequences of each option  |   |   |   |   |   |   |   |   |   |    |    | 3  | 3  | 3  | 3  | 3  | 3  | 3  | 2  | 3  |
| Value clarification                        | 2 | 3 | 3 | 2 | 4 | 3 | 3 | 3 | 3 | 2  | 3  | 3  | 3  | 4  | 3  | 3  | 4  | 2  | 2  | 1  |
| Combined use of two antipsychotic drugs:   |   |   |   |   |   |   |   |   |   |    |    |    |    |    |    |    |    |    |    |    |
| Preparation for SDM                        | 2 | 3 | 3 | 1 | 2 | 3 | 3 | 3 | 3 | 2  | 3  | 3  | 3  | 4  | 3  | 3  | 4  | 2  | 2  | 1  |
| Further treatment options                  | 3 | 3 | 3 | 1 | 3 | 3 | 2 | 3 | 3 | 2  | 4  | 3  | 3  | 3  |    | 3  | 3  | 2  | 2  | 1  |
| Comparing the pros and cons of each option | 3 | 3 | 3 | 1 | 3 | 3 | 2 | 3 | 3 | 2  | 4  | 3  | 3  | 3  |    | 3  | 2  | 2  | 2  | 3  |
| Comparing the consequences of each option  | 3 | 3 | 3 | 2 | 3 | 3 | 2 | 3 | 3 | 3  | 3  | 3  | 3  | 3  |    | 3  | 3  | 3  | 2  | 2  |
| Value clarification                        | 3 | 3 | 3 | 1 | 3 | 3 | 2 | 3 | 3 | 3  | 4  | 3  | 3  | 4  |    | 3  | 4  | 2  | 2  | 1  |
| Preparation for shared decision making     | 3 | 3 | 3 | 1 | 3 | 3 | 2 | 3 | 3 | 2  | 2  | 3  | 3  | 4  |    | 3  | 4  | 2  | 2  | 1  |
| Appendices                                 | 2 | 3 | 3 | 2 | 3 | 3 | 2 | 3 | 3 | 2  | 3  | 3  | 4  | 3  |    | 4  | 4  | 3  | 2  | 3  |

## Health-care providers

| Health-care providers                                                                                                               | 1 | 2 | 3 | 4 | 5 | 6 | 7 | 8 | 9 | 10 | 11 | 12 | 13 | 14 | 15 | 16 | 17 | 18 | 19 | 20 |
|-------------------------------------------------------------------------------------------------------------------------------------|---|---|---|---|---|---|---|---|---|----|----|----|----|----|----|----|----|----|----|----|
| It will be easy for me to use.                                                                                                      | 3 | 4 | 3 | 4 | 3 | 4 | 4 | 4 | 5 | 3  | 3  | 4  | 4  | 4  | 4  | 5  | 4  | 4  | 5  | 5  |
| It is easy for me to understand.                                                                                                    | 3 | 4 | 3 | 3 | 3 | 4 | 3 | 4 | 4 | 2  | 2  | 4  | 4  | 4  | 3  | 5  | 4  | 4  | 4  | 4  |
| It will be easy for me to experiment with using the strategy before making a final decision to adopt it.                            | 4 | 4 | 5 | 3 | 3 | 3 | 4 | 3 | 4 | 3  | 3  | 3  | 4  | 3  | 3  | 4  | 4  | 4  | 5  | 4  |
| The results of using the strategy will be easy to see.                                                                              | 4 | 4 | 5 | 3 | 4 | 3 | 4 | 3 | 5 | 4  | 5  | 4  | 4  | 4  | 4  | 5  | 4  | 5  | 5  | 4  |
| This strategy is better than how I usually go about helping patients decide whether to reduce antipsychotics.                       | 3 | 4 | 5 | 3 | 3 | 3 | 4 | 3 | 5 | 3  | 3  | 3  | 5  | 3  | 5  | 5  | 4  | 4  | 5  | 4  |
| This strategy is compatible with the way I think things should be done.                                                             | 4 | 4 | 5 | 4 | 3 | 3 | 4 | 3 | 3 | 5  | 3  | 4  | 4  | 4  | 4  | 5  | 4  | 5  | 4  | 4  |
| The use of this strategy is more cost-effective than my usual approach to helping patients decide whether to reduce antipsychotics. | 3 | 4 | 3 | 3 | 3 | 3 | 4 | 4 | 3 | 4  | 4  | 4  | 3  | 4  | 5  | 5  | 3  | 4  | 3  | 3  |
| Compared with my usual approach, this strategy will help my patients make more informed decisions.                                  | 4 | 4 | 5 | 4 | 4 | 3 | 5 | 3 | 4 | 4  | 5  | 5  | 3  | 4  | 4  | 5  | 5  | 4  | 4  | 5  |
| Using this strategy will save me time.                                                                                              | 4 | 4 | 2 | 2 | 3 | 3 | 3 | 2 | 2 | 2  | 2  | 3  | 2  | 4  | 3  | 4  | 3  | 3  | 2  | 4  |
| This strategy is a reliable method for helping patients decide whether to reduce antipsychotics.                                    | 4 | 4 | 5 | 4 | 4 | 4 | 5 | 3 | 4 | 4  | 5  | 3  | 2  | 4  | 5  | 5  | 4  | 4  | 5  | 5  |
| Parts or components of the strategy can be used personally.                                                                         | 4 | 4 | 3 | 2 | 4 | 3 | 4 | 3 | 4 | 4  | 4  | 4  | 3  | 4  | 4  | 4  | 4  | 4  | 5  | 5  |
| This strategy is suitable for helping patients make value-laden choices.                                                            | 3 | 4 | 5 | 4 | 4 | 3 | 4 | 4 | 5 | 4  | 4  | 4  | 4  | 4  | 4  | 5  | 4  | 4  | 5  | 5  |
| This strategy complements my usual                                                                                                  | 3 | 4 | 4 | 3 | 4 | 3 | 4 | 3 | 3 | 4  | 4  | 4  | 3  | 4  | 4  | 5  | 4  | 4  | 5  | 3  |
| Using this strategy does not involve making major changes to the way I usually do things.                                           | 3 | 4 | 5 | 4 | 4 | 2 | 2 | 3 | 3 | 4  | 4  | 3  | 3  | 3  | 3  | 4  | 4  | 5  | 3  | 4  |
| There is a high probability that using this strategy may cause/result in more benefit than harm.                                    | 3 | 4 | 4 | 3 | 4 | 4 | 5 | 4 | 5 | 5  | 3  | 5  | 3  | 4  | 4  | 5  | 4  | 5  | 5  | 4  |
